# Supplementary material
Source: PubMed Central journal article supplement (PMC6802862)
Supplement: AJSLP-28-639-s001.pdf [file AJSLP-28-639-s001.pdf]

**Supplemental Material S1.** Individual participant data.

Aphasia type: A (anomic), B (Broca's), C (conduction), G (global), TS (transcortical sensory), W (Wernicke's)

Classification: I (improver), D (decliner), S (stable)

Diabetes management: 1 = medication, 2 = diet, 3 = medication and diet

AQ: aphasia quotient; WAB: Western Aphasia Battery–Revised (Kertesz, 2007)

| Participant | Age at stroke | # of WAB-Rs | Sex | Education (y) | Time post stroke at initial WAB | Diabetes (managed) | Exercised/week | Tx hrs (at last WAB-R) | AQ at initial WAB-R | AQ at last WAB-R | Classification | Aphasia type |
|-------------|---------------|-------------|-----|---------------|---------------------------------|--------------------|----------------|------------------------|---------------------|------------------|----------------|--------------|
| M2002       | 55            | 3           | M   | 16            | 44                              | N                  | 0              | 45                     | 68.1                | 72.6             | I              | B            |
| M2005       | 41            | 4           | F   | 16            | 24                              | N                  | 3              | 131.25                 | 31.8                | 54.8             | I              | B            |
| M2006       | 47            | 5           | M   | 10            | 8                               | Y (1)              | 0              | 62.92                  | 78                  | 85.8             | I              | A            |
| M2007       | 52            | 4           | M   | 12            | 224                             | N                  | 6              | 30                     | 20.9                | 20.7             | S              | B            |
| M2014       | 56            | 3           | M   | 12            | 11                              | N                  | 3              | 30                     | 88.8                | 97.6             | I              | A            |
| M2017       | 39            | 6           | F   | 12            | 26                              | N                  | 6              | 120                    | 43.4                | 55.6             | I              | B            |
| M2025       | 50            | 6           | M   | 16            | 30                              | N                  | 4.5            | 45                     | 70.7                | 64.6             | D              | TS           |
| M2029       | 43            | 4           | M   | 16            | 6                               | N                  | 0              | 52.5                   | 25.7                | 40.6             | I              | B            |
| M2030       | 54            | 6           | M   | 16            | 48                              | Y (2)              | 4              | 120                    | 47.6                | 51.5             | I              | B            |
| M2031       | 56            | 4           | M   | 20            | 6                               | N                  | 3              | 41.25                  | 31.2                | 34.4             | I              | W            |
| M2036       | 50            | 5           | M   | 18            | 21                              | N                  | 3              | 132.92                 | 72.7                | 72.2             | S              | B            |
| M2039       | 39            | 2           | F   | 15            | 40                              | Y (1)              | 3.03           | 0                      | 87.6                | 88.6             | S              | A            |
| M2040       | 49            | 7           | M   | 16            | 6                               | N                  | 1.5            | 142.5                  | 32.7                | 48.7             | I              | B            |
| M2042       | 60            | 3           | M   | 12            | 64                              | N                  | 0              | 15                     | 73.5                | 61.6             | D              | B            |
| M2044       | 44            | 3           | F   | 13            | 70                              | N                  | 5              | 15                     | 73.5                | 74.8             | S              | B            |
| M2049       | 67            | 3           | F   | 16            | 28                              | N                  | 3              | 11.25                  | 46.9                | 63.4             | I              | C            |
| M2084       | 68            | 2           | F   | 14            | 7                               | N                  | 4              | 11.25                  | 67.2                | 67.4             | S              | B            |
| M2087       | 52            | 2           | M   | 16            | 201                             | N                  | 5              | 22.5                   | 54.9                | 45.9             | D              | B            |
| M2092       | 44            | 2           | F   | 18            | 10                              | Y (1)              | 3              | 0                      | 78.3                | 88.8             | I              | C            |
| M2109       | 66            | 2           | F   | 12            | 11                              | N                  | 3              | 11.25                  | 47.8                | 39.8             | D              | C            |
| M2118       | 54            | 2           | M   | 18            | 12                              | N                  | 5              | 11.25                  | 37.6                | 41               | I              | B            |
| M2127       | 58            | 2           | M   | 12            | 7                               | N                  | 4              | 0                      | 57.8                | 52.1             | D              | TS           |
| M2134       | 42            | 2           | F   | 16            | 33                              | N                  | 4              | 0                      | 61.3                | 61.9             | S              | B            |
| M2136       | 67            | 2           | F   | 12            | 28                              | N                  | 5              | 11.25                  | 28.7                | 28.6             | S              | B            |
| M2165       | 52            | 2           | M   | 16            | 19                              | Y (3)              | 1              | 0                      | 5.6                 | 20.1             | I              | G            |
| M2172       | 68            | 2           | M   | 18            | 7                               | N                  | 2              | 11.25                  | 75.9                | 77.2             | S              | A            |
| M2173       | 71            | 2           | M   | 12            | 18                              | Y (1)              | 7              | 11.25                  | 62.2                | 57.8             | D              | B            |
| M2176       | 66            | 2           | M   | 13            | 21                              | N                  | 0              | 11.25                  | 72.7                | 68.9             | D              | C            |

|       |    |   |   |    |    |       |   |       |      |      |   |   |
|-------|----|---|---|----|----|-------|---|-------|------|------|---|---|
| M2179 | 46 | 2 | M | 16 | 82 | Y (1) | 0 | 22.5  | 25.2 | 20.5 | D | G |
| M4141 | 43 | 2 | F | 12 | 78 | Y (1) | 2 | 11.25 | 80.8 | 79.2 | S | B |
| M4214 | 69 | 2 | M | 15 | 11 | N     | 0 | 11.25 | 41.9 | 46.6 | I | W |
| M4217 | 68 | 2 | M | 16 | 23 | N     | 5 | 11.25 | 47.3 | 66.8 | I | B |
| M4223 | 48 | 2 | F | 17 | 23 | N     | 7 | 11.25 | 30.1 | 39   | I | B |
| M4138 | 62 | 2 | M | 14 | 48 | Y (1) | 7 | 11.25 | 77.8 | 90.4 | I | A |
| M4148 | 49 | 2 | M | 10 | 6  | N     | 5 | 11.25 | 20.1 | 26   | I | G |
| M2061 | 63 | 2 | M | 15 | 8  | N     | 5 | 0     | 46.3 | 52.7 | I | W |
| M2016 | 55 | 2 | M | 22 | 90 | Y (1) | 0 | 45    | 50.7 | 30.9 | D | B |
| M2046 | 49 | 2 | F | 14 | 59 | N     | 0 | 45    | 49.3 | 55.9 | I | C |
| M2086 | 71 | 2 | M | 20 | 22 | N     | 7 | 11.25 | 73.5 | 60.5 | D | C |

## Reference

Kertesz, A. (2007). *Western Aphasia Battery—Revised*. New York, NY: Grune & Stratton.
